# Supplementary material for: Soft polymer and nano-clay supracolloidal particles in adhesives: synergistic effects on mechanical properties
Source: Royal Society of Chemistry journal article supplement (doi:10.1039/b904740a), 2009-01-01
Supplement: b904740a.pdf [file b904740a.pdf]

## Supplementary Information

### Soft Polymer and Nano-Clay Supracolloidal Particles in Adhesives: Synergistic Effects on Mechanical Properties

Tao Wang,<sup>a</sup> Patrick J. Colver,<sup>b</sup> Stefan A. F. Bon,<sup>b\*</sup> and Joseph L. Keddie<sup>a\*</sup>

<sup>a</sup>Department of Physics, University of Surrey, Guildford, Surrey GU2 7XH, UK

<sup>b</sup>Department of Chemistry, University of Warwick, Coventry CV4 7AL, UK

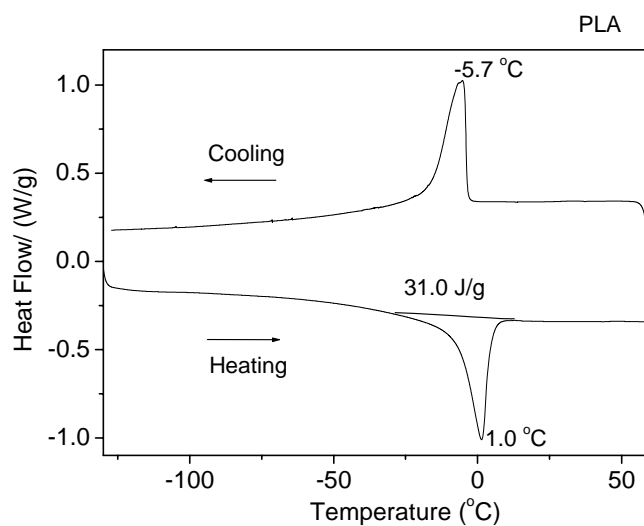

Figure S1. Differential scanning calorimetry of PLA. Heat-cool-heat cycles were performed, and the cooling and the second heating routes are presented here. The heating rate was 10 °C/min.

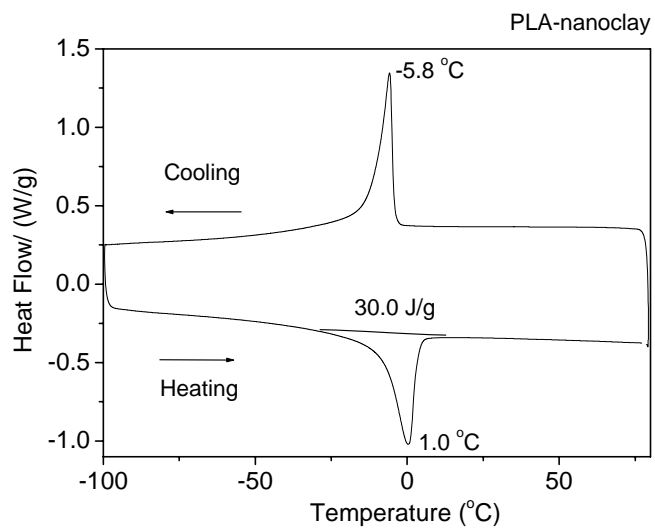

Figure S2. Differential scanning calorimetry of PLA-nanoclay. Heat-cool-heat cycles were performed, and the cooling and the second heating routes are presented here. The heating rate was 10 °C/min.
